**Title:** Rapid and Active Stabilization of Visual Cortical Firing Rates Across Light-Dark Transitions

**Abbreviated Title:** V1 Firing Rates Are Stable Across Light Transitions

**Authors:** Alejandro Torrado Pacheco\*<sup>1</sup>, Elizabeth I. Tilden\*<sup>1</sup>, Sophie M. Grutzner\*<sup>1</sup>, Brian J. Lane<sup>1</sup>, Yue Wu<sup>2</sup>, Keith B. Hengen<sup>1</sup>, Julijana Gjorgjieva<sup>2,3</sup>, Gina G. Turrigiano<sup>1</sup>

**Author affiliations**

1. Dept of Biology, Brandeis University, Waltham, MA 02453, USA

2. Max Planck Institute for Brain Research, 60438 Frankfurt, Germany

3: Technical University of Munich, School of Life Sciences, 85354 Freising, Germany

\*: These authors (A.T.P., E.I.T., S.M.G.) contributed equally to this work.

**Corresponding author:** Correspondence should be addressed to: Gina G. Turrigiano, Dept of Biology, MS008, Brandeis University, 415 South St, Waltham, MA 02453, USA.

[turrigiano@brandeis.edu](mailto:turrigiano@brandeis.edu)

**Number of pages:** 50

**Number of figures:** 8

**Number of words:** Abstract: 250; Introduction: 650; Discussion: 1268

**Acknowledgements**

This work was supported by R01EY025613 (G.G.T. and A.T.P.) and the Max Planck Society (Y.W. and J.G.). The authors declare no competing financial interests. We thank Lauren Kronheim for experimental help.

Current author affiliations for E.I.T and K.B.H.: Dept of Biology, Washington University, St Louis, MO 63130, USA; for S.M.G.: Dept of Biology, Stanford University, Stanford, CA 94305, USA.

1 **Abstract**

2       The dynamics of neuronal firing during natural vision are poorly  
3 understood. Surprisingly, mean firing rates of neurons in primary visual cortex (V1) of  
4 freely behaving rodents are similar during prolonged periods of light and darkness, but it  
5 is unknown whether this reflects a slow adaptation to changes in natural visual input, or  
6 insensitivity to rapid changes in visual drive. Here we use chronic electrophysiology in  
7 freely behaving rats of either sex to follow individual V1 neurons across many dark-light  
8 (D-L) and light-dark (L-D) transitions. We show that, even on rapid timescales (1s to 10  
9 min), neuronal activity was only weakly modulated by transitions that coincided with the  
10 expected 12h/12h light-dark cycle. In contrast, a larger subset of V1 neurons consistently  
11 responded to unexpected L-D and D-L transitions, and disruption of the regular L-D  
12 cycle with 60 hours of complete darkness induced a robust increase in V1 firing upon re-  
13 introduction of visual input. Thus, V1 neurons fire at similar rates in the presence or  
14 absence of natural stimuli, and significant changes in activity arise only transiently in  
15 response to unexpected changes in the visual environment. Further, although mean rates  
16 were similar in L and D, pairwise correlations were significantly stronger during natural  
17 vision, suggesting that information about natural scenes in V1 is more readily extractable  
18 from correlations than from individual firing rates. Together, our findings show that V1  
19 firing rates are rapidly and actively stabilized during expected changes in visual input,  
20 and are remarkably stable at both short and long timescales.

21

## 22 **Significance Statement**

23           The firing dynamics of neurons in primary visual cortex (V1) are poorly  
24 understood. Indeed, V1 neurons of freely behaving rats fire at the same mean rate in light  
25 and darkness. It is unclear how this stability is maintained, and whether it is important for  
26 sensory processing. We find that transitions between light and darkness happening at  
27 expected times have only modest effects on V1 activity. In contrast, both unexpected  
28 transitions and light re-exposure after extended darkness robustly increase V1 firing.  
29 Finally, pairwise correlations in neuronal spiking are significantly higher during the light,  
30 when natural vision is occurring. These data show that V1 firing is remarkably stable, and  
31 that neuronal correlations may represent sensory information better than mean firing  
32 rates.

33

## 34 **Introduction**

35           Neurons in the cerebral cortex are spontaneously active, but the function of this  
36 internally generated activity is largely unexplained. Ongoing activity has been proposed  
37 to be noise due to random fluctuations (Zohary et al., 1994; Shadlen and Newsome, 1998;  
38 Averbeck et al., 2006). However other experiments have shown that spontaneous activity  
39 possesses coherent spatio-temporal structure (Arieli et al., 1995; Tsodyks et al., 1999;  
40 Ch'ng and Reid, 2010), suggesting it may play an important role in the processing of  
41 natural sensory stimuli (Arieli et al., 1995; Kenet et al., 2003; Fiser et al., 2004; MacLean  
42 et al., 2005; Luczak et al., 2009, 2013). In primary visual cortex (V1), spontaneous  
43 activity observed in complete darkness is similar to that evoked by visual stimulation  
44 with random noise stimuli, and is only subtly modulated by natural scene viewing  
45 (Gallant et al., 1998; Fiser et al., 2004). Recently we showed that individual V1 neurons  
46 have very stable mean firing rates in freely behaving rodents, and that these mean rates  
47 are indistinguishable in light and dark when averaged across many hours (Hengen et al.,  
48 2016). How V1 firing can be stable across such drastic changes in the visual environment  
49 while still meaningfully encoding sensory stimuli, and whether this stability is actively  
50 maintained or simply arises from intrinsic circuit dynamics, remains unknown.

51           Regulation of individual firing rates around a stable set point is thought to be  
52 essential for proper functioning of cortical circuits in the face of developmental or  
53 experience-dependent perturbations to connectivity (Miller and MacKay, 1994;  
54 Turrigiano and Nelson, 2004). Long-term stability of individual mean firing rates has  
55 now been observed in rodent V1 (Hengen et al., 2013, 2016; Keck et al., 2013) and M1  
56 (Dhawale et al., 2017), suggesting it is a general feature of neocortical networks; further,

57 perturbing firing rates in V1 through prolonged sensory deprivation results in a slow but  
58 precise homeostatic regulation of firing back to an individual set-point, showing that  
59 neurons actively maintain these set points over long time-scales (Hengen et al., 2016).  
60 This stability in mean firing rates, even across periods of light and dark, raises the  
61 question of how natural visual input is encoded by V1 activity in freely behaving  
62 animals. One possibility is that changes in visual drive result in rapid fluctuations in  
63 mean firing rates that operate over seconds to minutes. Another possibility is that firing  
64 rates are stabilized even over these short time scales, and visual information is primarily  
65 encoded in higher order network dynamics.

66 To generate insight into these questions we followed firing of individual neurons  
67 in V1 of freely behaving young rats over several days, as animals experienced normal  
68 light-dark (L-D) and dark-light (D-L) transitions, or transitions that were unexpectedly  
69 imposed. We found that expected L-D transitions had a very modest effect on firing rates  
70 of both excitatory and inhibitory neurons, even when examined immediately around the  
71 time of the transition. Population activity did not change significantly across these  
72 transitions, and when examined at the level of individual neurons only a small subset  
73 (~15%) of excitatory neurons consistently responded, and then only during D-L  
74 transitions when animals were awake. Interestingly, randomly timed transitions  
75 throughout the light-dark cycle elicited more consistent responses across sleep-wake  
76 states and at both D-L and L-D transitions, and robust and widespread responses to D-L  
77 transitions could be unmasked by exposing animals to prolonged darkness for 60 hours.  
78 These results suggest that the stability normally observed at expected (circadian) L-D  
79 transitions reflects an active process of stabilization. Finally, although mean rates were

80 very similar in L and D, the pairwise correlations between simultaneously recorded  
81 neurons were significantly higher in the light than in the dark, even when controlling for  
82 behavioral state. Together our findings show that firing rates in V1 are actively stabilized  
83 as animals navigate dramatic changes in the visual environment, and that the correlational  
84 structure of V1 activity may carry more information about natural visual scenes than  
85 firing rates.

86

## 87 **Materials and Methods**

88 All surgical and experimental procedures were approved by the Animal Care and Use  
89 Committee of Brandeis University and complied with the guidelines of the National  
90 Institutes of Health.

91 *Surgery and in vivo experiments.* The data analyzed in this study were collected in  
92 previous electrophysiological recordings (Hengen et al., 2016;  $n = 7$  rats), as well as from  
93 newly implanted animals ( $n = 7$  rats). All surgical procedures were as described  
94 previously (Hengen et al., 2013). Briefly, Long-Evans rats of either sex were bilaterally  
95 implanted with custom 16-channel 33  $\mu\text{m}$  tungsten microelectrode arrays (Tucker-Davis  
96 Technologies, Alachua, FL) into monocular primary visual cortex (V1m) on postnatal  
97 day 21 (P21). Location was confirmed post-hoc via histological reconstruction. Two  
98 EMG wires were implanted deep in the nuchal muscle. Animals were allowed to recover  
99 for two full days post-surgery in transparent plastic cages with *ad libitum* access to food  
100 and water. Recording began on the third day after surgery. The recording chamber (a  
101 12"x12" plexiglass cage with walls lined with high contrast low spatial frequency  
102 gratings) was lined with 1.5" of bedding and housed two rats. Animals had *ad libitum*  
103 food and water, and were separated by a clear plastic divider with 1" holes to allow for  
104 tactile and olfactory interaction while preventing jostling of headcaps and arrays.  
105 Electrodes were connected to commutators (TDT) to allow animals to freely behave  
106 throughout the recordings. Novel toys were introduced every 24h, to promote activity and  
107 exploration. Lighting and temperature were kept constant (LD 12:12, lights on at 7:30  
108 am, 21° C, humidity 25%-55%). Data were collected continuously for nine to eleven days  
109 (200-240 hours). Some animals ( $n = 11$  rats) underwent a lid suture and/or eye reopening

110 procedure on the third day of recording; in the present study we only analyzed data  
111 collected from the control hemisphere ipsilateral to the manipulated eye. For dark-  
112 exposure experiments, animals were kept in the dark starting on days 4 and 5 of the  
113 recording (i.e. starting at the time of lights off on day 3, from P26 to P28). Lights came  
114 on at the regular time (7:30 AM) on day 6 (P29).

115 *Electrophysiological recordings.* *In vivo* electrophysiological recordings were  
116 performed as previously described (Hengen et al., 2016). Briefly, data were acquired at  
117 25 kHz, digitized and streamed to disk for offline processing using a Tucker-Davis  
118 Technologies Neurophysiology Workstation and Data Streamer. Spike extraction and  
119 sorting was performed using custom MATLAB code. Spikes were detected as threshold  
120 crossings ( $-4$  s.d. from mean signal) and re-sampled at 3x the original rate. Each wire's  
121 waveforms were then subjected to principal component analysis (PCA) and the first four  
122 principal components were used for clustering using KlustaKwik (Harris et al., 2000).  
123 Clusters were merged or trimmed as described previously (Hengen et al., 2016). Spike  
124 sorting was done using custom MATLAB code relying on a random forest classifier  
125 trained on a manually scored dataset of 1200 clusters. For each cluster identified from the  
126 output of KlustaKwik, we extracted a set of 19 features, including ISI contamination (%  
127 of ISIs  $< 3$  ms), similarity to regular spiking unit (RSU) and fast-spiking (FS) waveform  
128 templates, 60 Hz noise contamination, rise and decay time and slope of the mean  
129 waveform, waveform amplitude and width. Cluster quality was also ensured by  
130 thresholding of L-Ratio and Mahalanobis distance (Schmitzer-Torbert et al., 2005). The  
131 random forest algorithm classified clusters as noise, multi-unit or single-unit. Only single  
132 units with a clear refractory period were used for further analysis. Units were classified as



133 RSU or FS based on the time between the negative peak and the first subsequent positive  
134 peak of the mean waveform (Fig. 1B). Clusters were classified as RSUs if this value was  
135  $> 0.39$  msec, and as FS otherwise (Niell & Stryker, 2008), with a lower threshold of 0.19  
136 msec to eliminate noise. We used previously established criteria and methods to select  
137 neurons that we could reliably follow over time (Hengen et al., 2016); only neurons that  
138 could be recorded for at least 48 consecutive hours were used for analysis of light-dark  
139 transitions. For extended dark experiments, we analyzed all neurons that were online for  
140 at least one hour preceding and one hour following the time of light re-exposure. For  
141 estimates of mean firing during the extended dark phase, we analyzed the activity of all  
142 cells that could be recorded in the first and last 12-hour period during the 60 hours of  
143 darkness.

144 *Behavioral state classification.* The behavioral state of animals was classified using a  
145 combination of local field potential (LFP), EMG and estimate of locomotion based on  
146 video analysis (see Hengen et al., 2016). LFPs were extracted from three separate  
147 recorded channels, resampled at 200 Hz, and averaged. The power spectral density was  
148 computed in 10-second bins using a fast Fourier transform method (MATLAB  
149 “spectrogram” function) using frequency steps of 0.1 Hz from 0.3 to 15 Hz. Power in the  
150 delta (0.3 - 4 Hz) and theta (6 – 9 Hz) bands was computed as a fraction of total power in  
151 each time bin. A custom algorithm was used to score each 10-second bin and assign one  
152 of four behavioral codes, based on the power in each frequency band as well as EMG and  
153 movement activity: active wake (high EMG and movement, low delta and theta), quiet  
154 wake (low EMG and movement, low delta and theta), REM sleep (very low EMG, no  
155 movement, low delta, high theta), and NREM sleep (low EMG and movement, high

156 delta, low theta). For each animal, each hour of data was scored separately. The first ten  
157 hours were scored manually, and used as an initial training set for a random forest  
158 classifier (implemented in Python). The classifier was then used to score each successive  
159 hour, with manual corrections performed as needed. The classifier was re-trained after  
160 every hour scored, with a maximum number of 10,000 bins used for training (only the  
161 latest 10,000 bins were used).

162 *Extended darkness, immunostaining and image analysis.* For analysis of c-fos protein  
163 following extended darkness, we transferred animals to custom dark box on P21. A light  
164 timer was set up to allow for complete control of the light-dark cycle inside the box.  
165 When animals were P26, lights were allowed to turn off at the regular time (7:30 PM),  
166 and set up to not turn back on. Animals were in complete darkness for 60 hours, from the  
167 night of P26 until night of P28 (ages matched with electrophysiological recordings). On  
168 the morning of P29, lights were allowed to turn back on at 7:30 AM. Animals were  
169 allowed to experience one hour of light before being deeply anesthetized and  
170 transcardially perfused. Control animals were either not exposed to darkness but kept on  
171 a regular 12h cycle, or anesthetized at 7:30 AM on P29 (before lights on) in the dark  
172 using night-vision goggles and then immediately perfused. Brains were fixed in 3.7%  
173 formaldehyde and 60  $\mu\text{m}$  coronal slices of V1m were taken on a vibratome (Leica  
174 VT1000S). Slices were immersed in a solution of PBS and  $\text{NaN}_3$  and stored for  
175 immunostaining. To ensure consistent results between groups, all conditions were run in  
176 parallel. Slices were incubated for in a primary antibody solution (1:1000, Rabbit anti-c-  
177 fos, Cell Signaling Technologies) at room temperature for 24 hours. They were then  
178 rinsed and incubated for 2 hours with a secondary antibody (anti-rabbit Alexa Fluor 568,

179 1:400, Thermofisher). Sections were mounted on microscope slides with a DAPI-  
180 containing medium (DAPI Fluoromount-G, Southern Biotech), coverslipped and allowed  
181 to dry for 24 hours before imaging. Imaging was performed on a confocal microscope  
182 (Zeiss Laser Scanning Microscope 880). A 10X objective was used to take z-stacks of  
183 V1m in the DAPI and c-fos channels. Imaging settings were optimized for each  
184 staining/imaging session and kept constant across conditions; all conditions were imaged  
185 on a given session. Images were imported into Metamorph software for analysis. A  
186 granularity analysis was used to determine locations of cell bodies, and co-localized  
187 DAPI- and c-fos-positive granules were counted as c-fos-positive neurons. For each slice  
188 we analyzed the whole field of view, excluding the slice edges as they displayed DAPI  
189 staining artifacts.

190 *Analysis of electrophysiological data.* All electrophysiology data was analyzed using  
191 a custom code package written in Python. The precise time of lights on/off was  
192 determined by analysis of video recordings or using a light-sensitive resistor. All analyses  
193 were performed on the 10 minutes before and after transitions. Peri-event time  
194 histograms were obtained by binning data in 0.25 second bins and normalizing data to the  
195 pre-transition period. Firing rates were estimated by sliding a 1 or 2 minute window in  
196 20-second steps. Mean and s.e.m. were estimated by averaging across days. To compare  
197 population data across transitions we calculated the average firing rate in the 10 minutes  
198 before and after the transition without binning. For analysis restricted to a given  
199 behavioral state, we only considered transitions during which the animal was in that state  
200 for the whole 20 minutes (10 minutes before and after the transition). To estimate the  
201 number of individual neurons that consistently changed their firing rate in response to L-

202 D and D-L transitions, we used a paired t-test to determine whether the neuron's firing  
203 followed a consistent pattern of change across multiple transitions. We used a bootstrap  
204 method to estimate the number of cells expected to pass our significance threshold by  
205 chance; for each iteration of the bootstrap, we chose a random time point within the first  
206 24h. We then created dummy transition times at 12 hour intervals from that starting time  
207 point, and used these dummy transition points to repeat the above analysis for each cell.  
208 This procedure was repeated 100 times (i.e. with 100 different dummy transition points),  
209 to obtain 100 values for the percent of significantly changing cells. We used this dataset  
210 to estimate the mean and 95% confidence intervals for this parameter. Only neurons that  
211 were followed through at least 4 transitions were used for analysis of circadian  
212 transitions. For non-circadian transitions, we analyzed neurons that experienced at least 6  
213 transitions.

214 *Pairwise correlations.* Each spike train was binned into spike counts of bin size  
215 100 ms, generating a vector of spike counts for each cell. The spike count correlation  
216 coefficient  $\rho$  for a pair of neurons was computed in 30 minute episodes using a  
217 sliding window of 5 minutes. This produced 139 values for each neuron pair on  
218 every single half day (12 hours of light and 12 hours of darkness). The average of  
219 these values then determined the correlation value of each pair for every single half  
220 day:

$$\rho_{X,Y} = \frac{E[(X - \mu_X)(Y - \mu_Y)]}{\sigma_X \sigma_Y}$$

221

222 where  $X$  and  $Y$  represent the spike count vectors of two cells, respectively;  $\mu_X$  and  $\mu_Y$   
223 are the means of  $X$  and  $Y$ ;  $\sigma_X$  and  $\sigma_Y$  denote the standard deviations of  $X$  and  $Y$ ;  $E$  is the

224 expectation. This produced the matrices of pairwise spike count correlations on different  
225 half days. To generate the normalized correlation curve, correlations were normalized to  
226 the average correlation of each animal at P26 during the light period. Correlations in  
227 mixed behavioral states were computed with the above-stated method using the entire 12-  
228 hour periods of L or D, while correlations in wake only took into account the wake  
229 episodes. Results with bin size of 5 ms followed the same approach.

230 *Experimental design and statistical analysis.* For paired data, both for firing rates and  
231 spike count correlations, comparisons were done using a Wilcoxon signed-rank test. To  
232 compare a population mean to a given value (e.g. 0) we used one-sample t-tests. To  
233 compare cumulative distributions we used Kolmogorov-Smirnov tests. Data are  
234 represented as mean  $\pm$  s.e.m. Box plots represent median  $\pm$  interquartile range, with  
235 whiskers extending to the rest of the distribution. All statistical analyses were performed  
236 using Python.

237 *Code accessibility.* All code used for analysis is available from the authors upon  
238 request.

239

240

## 241 **Results**

242           Neurons in V1 maintain remarkably similar mean firing rates in L and D, but how  
243 L-D transitions affect firing on more rapid time scales in freely viewing and behaving  
244 animals is unclear. Here we use chronic *in vivo* electrophysiological recordings from  
245 freely behaving rats to closely examine the activity of V1 neurons at D-L and L-D  
246 transitions in regular (12h/12h) and manipulated light/dark cycles, and during unexpected  
247 light-dark transitions. Using previously established methods (Hengen et al., 2016) we  
248 followed individual neurons over time and across multiple light transitions. This  
249 approach allowed us to analyze the dynamics of neuronal activity at different timescales  
250 in response to the appearance or disappearance of natural visual stimuli.

251

### 252 **The appearance or disappearance of natural visual stimuli has only a modest effect** 253 **on the mean firing rates of V1 neurons.**

254           The firing rates of V1 neurons recorded in freely behaving young rats in light and  
255 dark are exceedingly similar when averaged in 12-hour periods (Hengen et al., 2016).  
256 Here we combine previously and newly acquired datasets and set out to re-analyze the  
257 activity of V1 neurons around the transition from presence to absence of visual input  
258 (light-dark, L-D), and vice versa (dark-light, D-L) (Fig. 1A). Recorded neurons were  
259 classified as regular spiking units (RSU,  $n = 96$ ) or fast-spiking cells (FS,  $n = 32$ ) based  
260 on waveform shape and according to established criteria (Fig. 1B; Niell & Stryker, 2008;  
261 Hengen et al., 2013). These populations are mostly comprised of excitatory pyramidal

262 neurons (RSU) and GABAergic parvalbumin-containing interneurons (FS) (Kawaguchi  
263 & Kubota, 1993; Nowak et al., 2003).

264 As rats experience L-D or D-L transitions, most neurons showed little change in  
265 firing (Fig. 1C). We treated each transition as a separate trial and estimated the firing rate  
266 for each cell as the average of the peri-event time histogram (PETH) centered on the  
267 transition. We first aimed to compare activity at the population level in different stimulus  
268 conditions. To this end, we determined whether the distributions of mean firing rates  
269 averaged over 10 minutes on either side of the L-D and D-L transitions were similar to  
270 each other. Cumulative distributions in light and dark were indistinguishable, for both  
271 RSU and FS cells, in all conditions (Fig. 1D, E; two-sample Kolmogorov-Smirnov test,  
272 RSU, L-D:  $p = 0.88$ ; D-L:  $p = 0.99$ ; FS, L-D:  $p = 0.99$ ; D-L:  $p = 1.0$ ). Similarly, when we  
273 compared the distributions using a Wilcoxon rank-sum test, we found no difference  
274 between the distributions of mean firing rates before vs. after the transitions (Wilcoxon  
275 rank-sum test, RSU, L-D:  $p = 0.677$ ; D-L:  $p = 0.655$ ; FS, L-D:  $p = 0.905$ ; D-L:  $p =$   
276  $0.827$ ).

277 Next we took advantage of our ability to follow individual neurons across  
278 transitions to examine the data in a paired manner, where the firing rate of each neuron  
279 was compared before and after the transition. For each neuron we computed mean firing  
280 rate in the 10 minutes before and after the transition time, and averaged across transitions  
281 of the same type to estimate the average effect on individual neuronal firing. This  
282 analysis revealed a small but consistent change in mean RSU firing rates across both L-D  
283 and D-L transitions (Fig. 1F; Wilcoxon sign-rank test: L-D:  $p = 0.0002$ ; D-L:  $p <$   
284  $0.0001$ ), while the activity of FS cells only changed significantly at D-L transitions (Fig.

285 1G; Wilcoxon sign-rank test: L-D:  $p = 0.318$ ; D-L:  $p = 0.026$ ). The magnitude of these  
286 effects was small, on order 7-15% for RSUs (Fig. 1H, I; RSU, L-D:  $-7.09\% \pm 1.99\%$ ,  $p =$   
287  $0.0006$ ; D-L:  $15.60\% \pm 4.00\%$ ,  $p = 0.0002$ ; FS, L-D:  $-2.75\% \pm 3.80\%$ ,  $p = 0.475$ ; D-L:  
288  $9.73\% \pm 5.12\%$ ,  $p = 0.067$ , one-sample t-test).

289 These data show that, surprisingly, dramatic changes in visual input cause very  
290 minor changes in V1 firing rates. The distributions of mean rates in the presence and  
291 absence of natural visual stimuli are identical in the proximity of transitions. Analysis of  
292 many transitions shows that RSU firing rates are consistently affected when the visual  
293 environment changes, but this modulation is decidedly modest.

294

### 295 **Behavioral state affects sensitivity of firing rates to visual stimuli**

296 As rats were freely behaving throughout all experiments, we considered whether  
297 their alertness state at the light transitions could affect the activity of V1 neurons. LFP,  
298 EMG and video data were collected and used to score animals' behavioral state into  
299 either asleep or awake (Hengen et al., 2016). For each animal, 20-minute periods  
300 centered on the L-D and D-L transitions were considered. Only periods during which the  
301 animal remained in the same behavioral state for the entire time were analyzed. For each  
302 neuron, we plotted the mean firing rate before the transition against the mean rate after  
303 the transition. The activity of neurons proved to be strikingly similar across all  
304 transitions, whether the animals were awake or asleep (Fig. 2A, B). In either behavioral  
305 state, firing rates in light and dark were very strongly correlated, and the slope of the  
306 regression line was close to one (RSU, wake, L-D: slope = 0.959,  $r = 0.966$ ,  $p < 10^{-43}$ ; D-  
307 L: slope = 0.960,  $r = 0.991$ ,  $p < 10^{-48}$ ; FS, wake, L-D: slope = 1.113,  $r = 0.964$ ,  $p < 10^{-13}$ ;



308 D-L: slope = 0.976,  $r = 0.990$ ,  $p < 10^{-18}$ ; RSU, sleep, L-D: slope = 1.147,  $r = 0.941$ ,  $p <$   
309  $10^{-12}$ ; D-L: slope = 0.990,  $r = 0.996$ ,  $p < 10^{-13}$ ; FS, sleep, L-D: slope = 1.093,  $r = 0.987$ ,  $p$   
310  $< 10^{-13}$ ; D-L: slope = 1.003,  $r = 0.996$ ,  $p < 10^{-11}$ ).

311 We again looked at the data in paired form, by comparing a neuron's average  
312 firing rate on either side of a L-D transition. The mean activity of RSUs in V1 changed  
313 consistently across transitions when animals were awake (Fig. 2C; L-D:  $p = 0.0001$ ; D-L:  
314  $p = 0.0457$ , Wilcoxon signed-rank test), but not when they were asleep (Fig. 2D; L-D:  $p$   
315  $= 0.656$ ; D-L:  $p = 0.925$ , Wilcoxon signed-rank test). We observed a similar pattern in FS  
316 cells, although the data in the wake condition was not significant for light-dark transitions  
317 (Fig. 2E, F; Wake, L-D:  $p = 0.689$ ; D-L:  $p = 0.039$ ; Sleep, L-D: 0.557; D-L:  $p = 0.638$ ;  
318 Wilcoxon signed-rank test). Once again, these effects were of small magnitude (7-12%).  
319 Thus, V1 neurons do not respond to expected (circadian) changes in the visual  
320 environment when animals are asleep, and respond only modestly when animals are  
321 awake.

322

### 323 **A sub-population of RSUs is consistently responsive to dark-light transitions**

324 While we only detected small changes at the population levels (and no change in  
325 the population distribution), we occasionally observed neurons whose activity appeared  
326 to be consistently modulated by visual stimuli. The majority of neurons showed no  
327 spiking modulation across multiple transitions (Fig. 3A), but a subset of neurons showed  
328 higher activity on one side of the transition (Fig. 3B). Occasionally neurons responded to  
329 both L-D and D-L transitions (Fig. 3B), but more often neurons were only responsive to  
330 one or the other. To quantify these observations, we treated each transition independently

331 for each neuron, and averaged firing rates for 10 minutes before and after lights on/off,  
332 and identified neurons that changed their firing rate consistently across transitions using a  
333 paired t-test.

334 Because neuronal firing rates are variable, we presumed that some of these  
335 apparent responses were spurious. To estimate the false positive rate we performed a  
336 bootstrap analysis using random time points as dummy “transitions”. We chose nine  
337 transition points 24 hours apart from each other (to match circadian transitions) and  
338 analyzed mean firing rates for each neuron as above but using these dummy transition  
339 points. This process was repeated 100 times to arrive at an estimate of the mean and 95%  
340 confidence interval for the percentage of responsive cells (mean and 95% CI, RSU, L-D:  
341 3.55% [0% - 12.62%], D-L: 3.09% [0% - 9.91%]; n= 64).

342 The proportion of cells we found to be transition-responsive was within the range  
343 expected by chance for all conditions except for RSUs in D-L transitions (Fig. 3C). We  
344 found that 14% of RSUs in our experimental condition had significantly changing firing  
345 rates from dark to light, well outside the range expected by chance (95% CI for this  
346 group: [0% - 9.91%]). In addition, most of these neurons (88.9%) showed an increase in  
347 firing rate at the onset of light, while in the bootstrap control neurons were found to have  
348 an equal probability of increasing or decreasing their activity at a given transition point  
349 (51.8% of neurons increasing).

350 Finally, we examined the temporal dynamics of firing rate changes for the subset  
351 of RSUs that were consistently responsive to D-L transitions. We plotted the mean  
352 activity within 1 hour of the transition, across all transitions and across neurons for this  
353 subpopulation (Fig. 3D). On average, the change in FR was short-lived, on the order of

354 ~10 minutes, and of moderate size (~25% increase). This analysis shows that a small  
355 subset of excitatory pyramidal neurons in V1 consistently modulate their activity in  
356 response to the expected appearance of visual input after a circadian 12-hour period of  
357 darkness. This change is transient, with firing rates returning to pre-transition levels  
358 within minutes.

359

### 360 **Light transitions have no effect on average ISIs over short timescales**

361 Our analysis so far shows that, on a timescale of 10s of minutes, few V1 neurons  
362 show significant firing rate modulation to the appearance or disappearance of natural  
363 visual stimuli. One possible explanation for this apparent lack of responsiveness is that  
364 these dramatic sensory changes trigger a rapid adaptation mechanism that quickly  
365 restores average V1 activity back to baseline. Such adaptation mechanisms within V1  
366 have been well described, and can operate on a time-scale of 100s of ms to many minutes  
367 (Kohn, 2007; Wissig and Kohn, 2012; Benucci et al., 2013). To address this possibility,  
368 we examined neuronal firing in 1-, 10- and 30-second intervals around L-D and D-L  
369 transitions. Spiking in these short time windows was sparse and variable across days (Fig.  
370 4A, B). We averaged the mean inter-spike interval (ISI) across days for each cell, and  
371 compared averages in the 10 seconds before and after transitions. To ensure we were not  
372 missing effects on even shorter timeframes we also computed the mean ISI in 1-second  
373 windows around the transitions. For both the 1-sec and the 10-sec case, we found no  
374 statistically significant effect (Fig. 4C, 1-sec, L-D:  $p = 0.27$ ; D-L:  $p = 0.36$ ; Fig. 4D, 10-  
375 sec, L-D:  $p = 0.97$ ; D-L:  $p = 0.31$ ; Wilcoxon sign-rank test). Similar results were obtained  
376 when this analysis was carried out with 5-sec and 30-sec intervals (data not shown). This

377 indicates that the stability of firing across transitions is not due to a short-term adaptation  
378 process that rapidly restores firing to baseline.

379

380 **Non-circadian, unexpected L-D transitions are more likely to perturb V1 firing**  
381 **rates**

382 All of our data so far suggest that dramatic changes in visual input at circadian L-  
383 D transitions have very subtle effects on V1 firing. We wondered if this might be due to  
384 circadian entrainment, i.e. that when L-D and D-L transitions happen at regular times  
385 they are expected and the response of neurons to otherwise salient stimuli is attenuated.  
386 To test this, we examined neuronal responses to stimulus transitions occurring at random  
387 points in the circadian cycle.

388 We recorded single-unit activity in V1 while turning the lights off (or on) for 10  
389 minutes during the light (or dark) cycle (Fig. 5A, n = 6 animals). We then calculated the  
390 number of neurons that consistently and significantly changed their firing at these  
391 unexpected transitions, and again used a bootstrap analysis to calculate the false positive  
392 rate. In marked contrast to expected transitions (Fig. 3D), we found that both L-D and D-  
393 L unexpected transitions caused a subset of RSUs to consistently modulate their spiking  
394 (Fig. 5B, C). This effect was seen regardless of behavioral state (significantly changing  
395 RSUs, sleep, L-D: 21.9%, n = 64; D-L: 13.4%, n = 67; wake, L-D: 17.6%, n = 91; D-L:  
396 12.7%, n = 55) and the proportion of significantly changing neurons was higher than  
397 expected by chance in most conditions (bootstrap mean and 95% CI, RSU, sleep, L-D:  
398 4.42% [0% - 8.95%], D-L: 4.31% [0% - 9.38%]; RSU, wake, L-D: 4.22% [0% - 8.79%],  
399 D-L: 4.33% [0% - 9.09%]).

400           These results show that more neurons respond consistently to L-D and D-L  
401 transitions when these do not line up with the circadian cycle the animals are entrained  
402 on. However, even during unexpected transitions only a minority (12%-20%) of neurons  
403 consistently changed their firing rate in response to the appearance or disappearance of  
404 natural visual stimuli.

405

406   **Pairwise correlations in V1 are significantly higher in light than in dark**

407           To investigate whether higher order network properties are modified by the  
408 presence or absence of natural visual stimuli, we examined the structure of pairwise  
409 correlations in light and in dark (Fig. 6, n = 5 animals). Plotting the correlation matrices  
410 of one animal at P27 revealed that these correlations were higher in the light (calculated  
411 over the 12-hour period at P27) than in the dark (calculated over the 12-hour period at  
412 P27.5; Fig. 6A). We then plotted the average correlation computed continuously over 4  
413 days (normalized to the average correlation of each animal at P26 in light) (Fig. 6B). The  
414 normalized pairwise correlation showed a pronounced oscillation across light and dark  
415 periods, and was consistently higher in the light. To assess the degree to which  
416 correlation of individual pairs changed, we compared the correlation of 922 pairs in light  
417 versus dark computed for spike counts with bin sizes of 5 or 100 ms, respectively. We  
418 found that correlations in light were higher than in dark for both bin sizes (Fig. 6C; left, 5  
419 ms:  $p < 10^{-70}$ ; right, 100 ms:  $p < 10^{-125}$ , Wilcoxon signed-rank test). To ensure that the  
420 observed difference of correlations between light and dark was not caused by  
421 disproportionate time spent in wake or sleep, we restricted the analysis to periods of  
422 wake, and again computed the average correlation. Consistent with our previous analysis,

423 correlations in wake during light were significantly greater than in wake during dark (Fig.  
424 6D; left, 5 ms:  $p < 10^{-55}$ ; right, 100 ms:  $p < 10^{-110}$ , Wilcoxon signed-rank test). These  
425 results indicate that the presence of natural visual stimuli increases pairwise correlations  
426 in V1.

427

### 428 **Prolonged dark exposure enhances the responsiveness of V1 neurons to natural** 429 **visual input**

430 Our data show that re-exposure to light after 12 h of darkness has only modest  
431 effects on V1 firing; in contrast, re-exposing animals to light after a period of *prolonged*  
432 darkness is a standard paradigm for increasing activity-dependent gene expression in V1  
433 (Rosen et al., 1992; Mower, 1994; Kaminska et al., 1996; reviewed in Kaczmarek and  
434 Chaudhuri, 1997). We therefore wondered whether prolonged dark exposure might  
435 unmask robust responses to the sudden onset of visual stimuli within V1.

436 We began by using expression of the immediate early gene *c-fos*, which is driven  
437 by enhanced calcium influx during elevated activity (Bartel et al., 1989; Sheng et al.,  
438 1990; reviewed in Sheng and Greenberg, 1990). After prolonged darkness, brief light  
439 exposure induces widespread *c-fos* expression in V1 of cats and rodents (Rosen et al.,  
440 1992; Kaplan et al., 1996; Yamada et al., 1999; Mower and Kaplan, 2002). To replicate  
441 this we placed P26 rats in the darkness for 60 hours (12 hours + 2 days) and then exposed  
442 them to light for one hour before immunostaining for the c-fos protein (light exposed, n =  
443 28 slices, 5 animals). We used age-matched animals either exposed to one hour of light  
444 after a regular 12h/12h cycle (regular control, n = 22 slices, 4 animals), or kept in the  
445 dark for 60 hours but sacrificed before lights on (dark control, n = 23 slices, 4 animals),

446 as controls (Fig. 7A, B). Animals in the light exposure condition showed an elevated  
447 percentage of *c-fos*-positive cells (Fig. 7C; RC:  $11.4\% \pm 1.6\%$ ; DC:  $6.1\% \pm 0.8\%$ ; LE:  
448  $16.8\% \pm 1.7\%$ . LE vs RC  $p=0.032$ ; LE vs DC  $p=0.001$ , one-way ANOVA with Tukey  
449 post-hoc test), as well as increased total staining intensity (Fig. 7D; normalized to RC,  
450 RC:  $1.00 \pm 0.06$ ; DC:  $0.79 \pm 0.05$ ; LE:  $1.31 \pm 0.09$ . LE vs RC  $p=0.011$ ; LE vs DC  
451  $p=0.001$ , one-way ANOVA with Tukey post-hoc test). These data confirm that a 60-hour  
452 period of prolonged darkness is sufficient to induce increased expression of *c-fos* in  
453 rodent V1.

454 Next we asked whether this elevated *c-fos* expression was correlated with  
455 increased firing. We used the same paradigm as above but recorded continuously from  
456 V1 during the baseline, dark-exposure, and light re-exposure period ( $n = 4$  animals).  
457 Upon light re-exposure, both RSUs and FS cells showed a substantial transient increase  
458 in firing rate at the time of lights on (Fig 8A; RSU:  $n = 32$ ; FS:  $n = 12$ ). We compared  
459 average firing rates 10 minutes before and after the transition for each cell. Both FS and  
460 RSU populations showed a significant increase in firing rate following light exposure  
461 (Fig. 8C, D; RSU:  $p < 10^{-5}$ ; FS:  $p = 0.034$ ; Wilcoxon signed-rank test). The percent  
462 change in firing rate across the transition was also significantly different from zero (Fig.  
463 8B; all cells:  $87.1\% \pm 13.5\%$ ,  $p < 10^{-7}$ ; RSU:  $80.7\% \pm 14.9\%$ ,  $p < 10^{-5}$ ; FS:  $104.3\% \pm$   
464  $29.8\%$ ,  $p = 0.005$ ; one-sample t-test), and the majority of neurons increased their activity  
465 at lights on (RSU: 31/32 neurons; FS: 10/12 neurons).

466 It has been reported that prolonged dark exposure increases firing rates in rodent  
467 V1 (Bridi, de Pasquale, Lantz et al., 2018), suggesting that enhanced responsiveness to  
468 light re-exposure might arise from increased excitability of V1 circuitry. To examine this

469 we asked how prolonged dark exposure affected RSU firing rates in freely behaving  
470 animals prior to light re-exposure. When we compared the distribution of RSU firing  
471 rates during the first and last 12 hours of the 60-hour long period of prolonged darkness,  
472 rather than an increase, we found a small but significant *decrease* in firing rates (Fig. 8E;  
473 mean  $\pm$  s.e.m, first 12h:  $4.00 \pm 0.97$  Hz, last 12h:  $2.27 \pm 0.57$  Hz; median, first 12h: 1.18  
474 Hz; last 12h: 0.85 Hz;  $p = 0.044$ , Wilcoxon rank-sum test). Thus the enhanced  
475 responsiveness to restoration of natural visual stimuli is unlikely to be due to a simple  
476 global increase in circuit excitability. These data indicate that prolonged dark exposure  
477 disrupts the normal stability of V1 firing across D-L transitions, and suggests that the  
478 maintenance of this stability is dependent upon visual experience.

479



## 480 **Discussion**

481           How internal and external factors influence the long-term dynamics of  
482 neuronal firing in V1 is poorly understood. Here we recorded from ensembles of  
483 single units over a period of several days in freely viewing and behaving animals  
484 and found that firing rates of both excitatory and inhibitory V1 neurons were  
485 remarkably stable even when sensory input changed abruptly and dramatically.  
486 During expected circadian L-D transitions very few V1 neurons significantly  
487 changed their firing. A larger subset of V1 neurons were consistently responsive to  
488 unexpected L-D transitions, and disruption of the regular L-D cycle with two days of  
489 complete darkness induced a widespread and robust increase in V1 firing upon  
490 subsequent re-introduction of visual input. These data show that V1 neurons fire at  
491 similar rates in the presence or absence of natural visual stimuli, and that significant  
492 changes in mean activity arise only in response to unexpected changes in the visual  
493 environment. While mean firing rates were not different in L and D, pairwise  
494 correlations were significantly stronger in the light in the presence of natural visual  
495 stimuli, suggesting that information about natural scenes in V1 is more readily  
496 extractable from pairwise correlations than from individual firing rates. Taken  
497 together, our findings are consistent with a process of rapid and active stabilization  
498 of firing rates during expected changes in visual input, and demonstrate that firing  
499 rates in V1 are remarkably stable at both short and long timescales.

500           The near absence of firing rate modulation in response to the appearance (or  
501 disappearance) of natural visual stimuli may seem surprising, as there is a rich  
502 literature supporting the idea that V1 neurons respond to optimal stimuli by

503 increasing their spiking (Hubel and Wiesel, 1959, 1962; Campbell et al., 1968;  
504 Pettigrew, 1974; Henry et al., 1974; Movshon, 1975; De Valois et al., 1982; Gizzi et  
505 al., 1990; Carandini and Ferster, 2000). Many of these studies used anesthetized  
506 preparations, making comparisons with our results difficult, but our data are  
507 consistent with previous reports of small differences in overall activity between  
508 natural vision and complete darkness in awake animals (Fiser et al., 2004), and  
509 sparse modulation of spiking in response to natural scene viewing (Gallant et al.,  
510 1998; Vinje and Gallant, 2000; Haider et al., 2010; Herikstad et al., 2011). In general  
511 our data support the view that mean firing rates in V1 can be stabilized over both  
512 long (Hengen et al., 2016) and short timescales without interfering with visual  
513 coding, which may arise through very sparse modulation of spiking and/or higher  
514 order population dynamics (Haider et al., 2010; Vinck et al., 2015; Dipoppa et al.,  
515 2018).

516         Despite the lack of robust changes in population spike rates at D-L  
517 transitions, we did observe a small subset of neurons that transiently increased  
518 their firing specifically at the appearance of visual input (Fig. 4). Since this occurred  
519 in freely behaving animals, it is unlikely that these neurons were responding to the  
520 same optimal visual stimuli on consecutive days. The more parsimonious  
521 explanation seems to be that these are broadly tuned neurons that become activated  
522 at most D-L transitions. Interestingly, we detected a greater proportion of such  
523 transition-responsive cells when light transitions happened randomly throughout  
524 the L-D cycle, including a population of neurons that transiently responded to non-  
525 circadian L-D transitions by decreasing their firing rate (Fig. 4). Thus unexpected

526 changes in visual drive unmask robust and bidirectional changes in firing in a small  
527 subset (15-20%) of V1 neurons. There are several potential explanations for this  
528 effect. It is possible that the responsive neurons are specialized to represent this  
529 “unexpectedness” as an error signal, as has been proposed in some models of  
530 predictive coding (Rao and Ballard, 1999; Egnér et al., 2010). Alternatively, it could  
531 be the result of modulation by other brain areas that encode the surprise signal,  
532 akin to that seen in response to attention or reward cues (Shuler and Bear, 2006;  
533 Stănişor et al., 2013), or during modulation of V1 by locomotion (Niell and Stryker,  
534 2010). Finally, our data cannot distinguish between this last possibility and the  
535 opposite signal, i.e. a suppression of responses at expected transitions.

536 We were able to disrupt the normal conservation of firing rates across D-L  
537 transitions even more dramatically by using a prolonged dark-exposure paradigm,  
538 which induced a network-wide enhancement of firing upon light re-exposure. This  
539 paradigm is thought to induce metaplastic changes within V1 that increase AMPA  
540 quantal amplitude onto L2/3 pyramidal neurons (Goel and Lee, 2007; Blackman et  
541 al., 2012; Bridi, de Pasquale, Lantz et al., 2018), but the impact of these changes on  
542 overall V1 function and excitation/inhibition balance are unclear. A previous study  
543 in anesthetized animals found that several days of dark exposure increased firing  
544 rates in V1, raising the possibility that prolonged dark exposure increases overall V1  
545 excitability (Bridi, de Pasquale, Lantz et al., 2018); however, here we found a small  
546 but significant reduction in mean firing rate across the population in freely behaving  
547 animals, suggesting that circuit excitability is if anything reduced by prolonged dark  
548 exposure. Although the circuit mechanism by which dark exposure unmasks robust

549 responses to D-L transitions is unclear, these experiments suggest that normal  
550 visual experience is necessary to maintain the ability of V1 circuits to stabilize their  
551 firing across these transitions.

552         In contrast to our observations on the stability of firing rates, we found that  
553 pairwise correlations in visual cortex were markedly higher in the light phase than  
554 in the dark phase (Fig. 5). This is consistent with previous reports that ongoing  
555 spontaneous activity in the dark is less correlated than activity elicited by natural  
556 scene stimuli (Fiser et al., 2004; Karimipناه et al., 2017). Correlations are  
557 dependent on the degree of synchrony within neuronal circuits (Harris and Thiele,  
558 2011; Schölvinck et al., 2015) and are higher during anesthesia (Greenberg et al.,  
559 2008), raising the possibility that this is a simple reflection of time spent in different  
560 behavioral states during the L and D phase. However, we observed the same  
561 increased correlation in L when only analyzing periods when animals were awake,  
562 ruling out this possibility. Thus, we conclude that, in freely behaving and viewing  
563 animals, sensory input can shift visual cortical circuits to more correlated dynamical  
564 states, even in a condition of low synchrony when animals are awake.

565         Our results add to a growing body of work suggesting that ongoing activity in  
566 mammalian V1 plays an important role in modulating sensory responses, as well as  
567 in integrating other sensory, motor, and motivational signals (Tsodyks et al., 1999;  
568 Rao and Ballard, 1999; Treue, 2001; Fiser et al., 2004; Luczak et al., 2009, 2013;  
569 Goard and Dan, 2009; Ringach, 2009; Egnér et al., 2010; Niell and Stryker, 2010;  
570 Destexhe, 2011; Keller et al., 2012; Ayaz et al., 2013; Saleem et al., 2013; Vinck et al.,  
571 2015). Our results also show that firing rates of most V1 neurons are remarkably

572 stable over both long and short time scales and in the presence and absence of  
573 visual information, suggesting that most visual information during natural viewing  
574 is not encoded by changes in firing rates. Instead, our data suggest that  
575 perturbations in firing primarily occur during unexpected changes in visual input,  
576 indicating an effect of entrainment/expectation and the existence of an active  
577 mechanism for stabilization of activity. This may be of particular importance given  
578 the observation that pairwise correlations are increased when animals are exposed  
579 to visual input, as global fluctuations in firing rate can strongly affect the strength of  
580 correlations between pairs of neurons (Harris and Thiele, 2011). Thus, it is possible  
581 that stable firing rates enable changes in correlations to reflect differences in  
582 sensory input, and hence to promote effective sensory processing.

583 **References**

584 Arieli A, Shoham D, Hildesheim R, Grinvald A (1995). Coherent spatiotemporal patterns  
585 of ongoing activity revealed by real-time optical imaging coupled with single-unit  
586 recording in the cat visual cortex. *Journal of neurophysiology*, 73(5), 2072-2093.

587

588 Averbeck BB, Latham PE, Pouget A (2006). Neural correlations, population coding and  
589 computation. *Nature reviews neuroscience*, 7(5), 358-366.

590

591 Ayaz A, Saleem AB, Schölvinc ML, Carandini, M (2013). Locomotion controls spatial  
592 integration in mouse visual cortex. *Current Biology*, 23(10), 890-894.

593

594 Bartel DP, Sheng M, Lau LF, Greenberg ME (1989). Growth factors and membrane  
595 depolarization activate distinct programs of early response gene expression:  
596 dissociation of fos and jun induction. *Genes development*, 3(3), 304-313.

597

598 Benucci A, Saleem AB, Carandini M (2013). Adaptation maintains population  
599 homeostasis in primary visual cortex. *Nature neuroscience*, 16(6), 724-729.

600

601 Blackman MP, Djukic B, Nelson SB, Turrigiano GG (2012). A critical and cell-  
602 autonomous role for MeCP2 in synaptic scaling up. *Journal of*  
603 *Neuroscience*, 32(39), 13529-13536.

604

605 Bridi MCD, de Pasquale R, Lantz CL, Gu Y, Borrell A, Choi SY, He K, Lee HK,  
606 Quinlan EM, Kirkwood A (2018). Two distinct mechanisms for experience-  
607 dependent homeostasis. *Nature neuroscience*, 21, 843-850.

608

609 Campbell FW, Cleland BG, Cooper GF, Enroth-Cugell C (1968). The angular selectivity  
610 of visual cortical cells to moving gratings. *The Journal of Physiology*, 198(1),  
611 237-250.

612

613 Carandini M, Ferster D (2000). Membrane potential and firing rate in cat primary visual  
614 cortex. *Journal of Neuroscience*, 20(1), 470-484.

615

616 Ch'Ng YH, Reid C (2010). Cellular imaging of visual cortex reveals the spatial and  
617 functional organization of spontaneous activity. *Frontiers in integrative*  
618 *neuroscience*, 4, 20.

619

620 De Valois RL, Yund EW, Hepler N (1982). The orientation and direction selectivity of  
621 cells in macaque visual cortex. *Vision research*, 22(5), 531-544.

622

623 Destexhe A (2011). Intracellular and computational evidence for a dominant role of  
624 internal network activity in cortical computations. *Current opinion in*  
625 *neurobiology*, 21(5), 717-725.

626

- 627 Dhawale AK, Poddar R, Wolff SB, Normand VA, Kopelowitz E, Ölveczky BP (2017).  
628 Automated long-term recording and analysis of neural activity in behaving  
629 animals. *Elife*, 6, e27702.  
630
- 631 Dipoppa M, Ranson A, Krumin M, Pachitariu M, Carandini M, Harris KD (2018). Vision  
632 and locomotion shape the interactions between neuron types in mouse visual  
633 cortex. *Neuron*, 98(3), 602-615.  
634
- 635 Egner T, Monti JM, Summerfield C (2010). Expectation and surprise determine neural  
636 population responses in the ventral visual stream. *Journal of*  
637 *Neuroscience*, 30(49), 16601-16608.  
638
- 639 Fiser J, Chiu C, Weliky M (2004). Small modulation of ongoing cortical dynamics by  
640 sensory input during natural vision. *Nature*, 431(7008), 573-578.  
641
- 642 Gallant JL, Connor CE, Van Essen DC (1998). Neural activity in areas V1, V2 and V4  
643 during free viewing of natural scenes compared to controlled  
644 viewing. *Neuroreport*, 9(1), 85-89.  
645
- 646 Gizzi MS, Katz E, Schumer RA, Movshon JA (1990). Selectivity for orientation and  
647 direction of motion of single neurons in cat striate and extrastriate visual  
648 cortex. *Journal of neurophysiology*, 63(6), 1529-1543.  
649



650 Goard M, Dan Y (2009). Basal forebrain activation enhances cortical coding of natural  
651 scenes. *Nature neuroscience*, 12(11), 1444-1449.

652

653 Goel A, Lee HK (2007). Persistence of experience-induced homeostatic synaptic  
654 plasticity through adulthood in superficial layers of mouse visual cortex. *Journal*  
655 *of Neuroscience*, 27(25), 6692-6700.

656

657 Greenberg DS, Houweling AR, Kerr JN (2008). Population imaging of ongoing neuronal  
658 activity in the visual cortex of awake rats. *Nature neuroscience*, 11(7), 749-751.

659

660 Haider B, Krause MR, Duque A, Yu Y, Touryan J, Mazer JA, McCormick DA (2010).  
661 Synaptic and network mechanisms of sparse and reliable visual cortical activity  
662 during nonclassical receptive field stimulation. *Neuron*, 65(1), 107-121.

663

664 Harris KD, Henze DA, Csicsvari J, Hirase H, Buzsaki G (2000). Accuracy of tetrode  
665 spike separation as determined by simultaneous intracellular and extracellular  
666 measurements. *Journal of neurophysiology*, 84(1), 401-414.

667

668 Harris KD, Thiele A (2011). Cortical state and attention. *Nature reviews*  
669 *neuroscience*, 12(9), 509-523.

670

671 Hengen KB, Lambo ME, Van Hooser SD, Katz DB, Turrigiano GG (2013). Firing rate  
672 homeostasis in visual cortex of freely behaving rodents. *Neuron*, 80(2), 335-342.

673

674 Hengen KB, Torrado Pacheco A, McGregor JN, Van Hooser SD, Turrigiano GG (2016).

675 Neuronal firing rate homeostasis is inhibited by sleep and promoted by

676 wake. *Cell*, 165(1), 180-191.

677

678 Henry GH, Dreher B, Bishop PO (1974). Orientation specificity of cells in cat striate

679 cortex. *Journal of Neurophysiology*, 37(6), 1394-1409.

680

681 Herikstad R, Baker J, Lachaux JP, Gray CM, Yen SC (2011). Natural movies evoke spike

682 trains with low spike time variability in cat primary visual cortex. *Journal of*

683 *Neuroscience*, 31(44), 15844-15860.

684

685 Hubel DH, Wiesel TN (1959). Receptive fields of single neurones in the cat's striate

686 cortex. *The Journal of physiology*, 148(3), 574-591.

687

688 Hubel DH, Wiesel TN (1962). Receptive fields, binocular interaction and functional

689 architecture in the cat's visual cortex. *The Journal of physiology*, 160(1), 106-154.

690

691 Kaczmarek L, Chaudhuri A (1997). Sensory regulation of immediate-early gene

692 expression in mammalian visual cortex: implications for functional mapping and

693 neural plasticity. *Brain Research Reviews*, 23(3), 237-256.

694

695 Kaminska B, Kaczmarek L, Chaudhuri A (1996). Visual Stimulation Regulates the  
696 Expression of Transcription Factors and Modulates the Composition of AP-1 in  
697 Visual Cortex. *Journal of Neuroscience*, 16(12), 3968-3978.

698

699 Kaplan IV, Guo Y, Mower GD (1996). Immediate early gene expression in cat visual  
700 cortex during and after the critical period: differences between EGR-1 and Fos  
701 proteins. *Molecular brain research*, 36(1), 12-22.

702

703 Karimipناه Y, Ma Z, Miller JEK, Yuste R, Wessel R (2017). Neocortical activity is  
704 stimulus-and scale-invariant. *PloS one*, 12(5), e0177396.

705

706 Kawaguchi Y, Kubota Y (1993). Correlation of physiological subgroupings of  
707 nonpyramidal cells with parvalbumin-and calbindinD28k-immunoreactive  
708 neurons in layer V of rat frontal cortex. *Journal of neurophysiology*, 70(1), 387-  
709 396.

710

711 Keck T, Keller GB, Jacobsen RI, Eysel UT, Bonhoeffer T, Hübener M (2013). Synaptic  
712 scaling and homeostatic plasticity in the mouse visual cortex in  
713 vivo. *Neuron*, 80(2), 327-334.

714

715 Keller GB, Bonhoeffer T, Hübener M (2012). Sensorimotor mismatch signals in primary  
716 visual cortex of the behaving mouse. *Neuron*, 74(5), 809-815.

717

718 Kenet T, Bibitchkov D, Tsodyks M, Grinvald A, Arieli A (2003). Spontaneously  
719 emerging cortical representations of visual attributes. *Nature*, 425(6961), 954-  
720 956.

721

722 Kohn A (2007). Visual adaptation: physiology, mechanisms, and functional  
723 benefits. *Journal of neurophysiology*, 97(5), 3155-3164.

724

725 Luczak A, Barthó P, Harris KD (2009). Spontaneous events outline the realm of possible  
726 sensory responses in neocortical populations. *Neuron*, 62(3), 413-425.

727

728 Luczak A, Barthó P, Harris KD (2013). Gating of sensory input by spontaneous cortical  
729 activity. *Journal of Neuroscience*, 33(4), 1684-1695.

730

731 MacLean JN, Watson BO, Aaron GB, Yuste R (2005). Internal dynamics determine the  
732 cortical response to thalamic stimulation. *Neuron*, 48(5), 811-823.

733

734 Miller KD, MacKay DJ (1994). The role of constraints in Hebbian learning. *Neural*  
735 *Computation*, 6(1), 100-126.

736

737 Movshon JA (1975). The velocity tuning of single units in cat striate cortex. *The Journal*  
738 *of Physiology*, 249(3), 445-468.

739

740 Mower GD (1994). Differences in the induction of Fos protein in cat visual cortex during  
741 and after the critical period. *Molecular brain research*, 21(1-2), 47-54.

742

743 Mower GD, Kaplan IV (2002). Immediate early gene expression in the visual cortex of  
744 normal and dark reared cats: differences between fos and egr-1. *Molecular brain  
745 research*, 105(1-2), 157-160.

746

747 Niell CM, Stryker MP (2008). Highly selective receptive fields in mouse visual  
748 cortex. *Journal of Neuroscience*, 28(30), 7520-7536.

749

750 Niell CM, Stryker MP (2010). Modulation of visual responses by behavioral state in  
751 mouse visual cortex. *Neuron*, 65(4), 472-479.

752

753 Nowak LG, Azouz R, Sanchez-Vives MV, Gray CM, McCormick DA (2003).  
754 Electrophysiological classes of cat primary visual cortical neurons in vivo as  
755 revealed by quantitative analyses. *Journal of neurophysiology*, 89(3), 1541-1566.

756

757 Pettigrew JD (1974). The effect of visual experience on the development of stimulus  
758 specificity by kitten cortical neurones. *The Journal of physiology*, 237(1), 49-74.

759

760 Rao RP, Ballard DH (1999). Predictive coding in the visual cortex: a functional  
761 interpretation of some extra-classical receptive-field effects. *Nature  
762 neuroscience*, 2(1), 79-87.

763

764 Ringach DL (2009). Spontaneous and driven cortical activity: implications for  
765 computation. *Current opinion in neurobiology*, 19(4), 439-444.

766

767 Rosen KM, McCormack MA, Villa-Komaroff L, Mower GD (1992). Brief visual  
768 experience induces immediate early gene expression in the cat visual  
769 cortex. *Proceedings of the National Academy of Sciences*, 89(12), 5437-5441.

770

771 Saleem AB, Ayaz A, Jeffery KJ, Harris KD, Carandini M (2013). Integration of visual  
772 motion and locomotion in mouse visual cortex. *Nature neuroscience*, 16(12),  
773 1864.

774

775 Schmitzer-Torbert N, Jackson J, Henze D, Harris K, Redish AD (2005). Quantitative  
776 measures of cluster quality for use in extracellular  
777 recordings. *Neuroscience*, 131(1), 1-11.

778

779 Schölvinck ML, Saleem AB, Benucci A, Harris KD, Carandini M (2015). Cortical state  
780 determines global variability and correlations in visual cortex. *Journal of*  
781 *Neuroscience*, 35(1), 170-178.

782

783 Shadlen MN, Newsome WT (1998). The variable discharge of cortical neurons:  
784 implications for connectivity, computation, and information coding. *Journal of*  
785 *neuroscience*, 18(10), 3870-3896.

786

787 Sheng M, Greenberg ME (1990). The regulation and function of c-fos and other  
788 immediate early genes in the nervous system. *Neuron*, 4(4), 477-485.

789

790 Sheng M, McFadden G, Greenberg ME (1990). Membrane depolarization and calcium  
791 induce c-fos transcription via phosphorylation of transcription factor  
792 CREB. *Neuron*, 4(4), 571-582.

793

794 Shuler MG, Bear MF (2006). Reward timing in the primary visual  
795 cortex. *Science*, 311(5767), 1606-1609.

796

797 Stănişor L, van der Togt C, Pennartz CM, Roelfsema PR (2013). A unified selection  
798 signal for attention and reward in primary visual cortex. *Proceedings of the  
799 National Academy of Sciences*, 110(22), 9136-9141.

800

801 Treue S (2001). Neural correlates of attention in primate visual cortex. *Trends in  
802 neurosciences*, 24(5), 295-300.

803

804 Tsodyks M, Kenet T, Grinvald A, Arieli A (1999). Linking spontaneous activity of single  
805 cortical neurons and the underlying functional architecture. *Science*, 286(5446),  
806 1943-1946.

807

808 Turrigiano GG (2008). The self-tuning neuron: synaptic scaling of excitatory  
809 synapses. *Cell*, 135(3), 422-435.

810

811 Turrigiano GG, Nelson SB (2004). Homeostatic plasticity in the developing nervous  
812 system. *Nature Reviews Neuroscience*, 5(2), 97-107.

813

814 Vinck M, Batista-Brito R, Knoblich U, Cardin JA (2015). Arousal and locomotion make  
815 distinct contributions to cortical activity patterns and visual  
816 encoding. *Neuron*, 86(3), 740-754.

817

818 Vinje WE, Gallant JL (2000). Sparse coding and decorrelation in primary visual cortex  
819 during natural vision. *Science*, 287(5456), 1273-1276.

820

821 Wissig SC, Kohn A (2012). The influence of surround suppression on adaptation effects  
822 in primary visual cortex. *Journal of neurophysiology*, 107(12), 3370-3384.

823

824

825 Yamada Y, Hada Y, Imamura K, Mataga N, Watanabe Y, Yamamoto M (1999).  
826 Differential expression of immediate-early genes, c-fos and zif268, in the visual  
827 cortex of young rats: effects of a noradrenergic neurotoxin on their  
828 expression. *Neuroscience*, 92(2), 473-484.

829



830 Zohary E, Shadlen MN, Newsome WT (1994). Correlated neuronal discharge rate and its  
831 implications for psychophysical performance. *Nature*, 370(6485), 140-143.  
832

## 833 **Figure Legends**

834

835 **Figure 1.** Circadian L-D and D-L transitions have a small effect on V1 firing rates.

836 **A**, Experimental protocol. Single-unit recordings were obtained from juvenile rats for a  
837 continuous 9-day period (P24-P32). Throughout this period animals were kept in a  
838 regular 12h/12h light/dark cycle and thus underwent light-dark (L-D, purple arrows) and  
839 dark-light (D-L, yellow arrows) transitions at regular 12-hour intervals. **B**, Left, average  
840 waveform for each continuously recorded unit, identified as regular spiking unit (RSU,  
841 red) or fast-spiking cell (FS, blue). Right, plot of trough-to-peak time vs waveform slope  
842 0.4 ms after trough reveals the bi-modal distribution used to classify recorded units as  
843 RSU or FS. **C**, Example raster plot of spiking activity for a recorded unit across several  
844 days, showing 20 minutes of activity centered on the L-D (top) and D-L (bottom)  
845 transitions. Blue bars represent the peri-event time histogram obtained by averaging  
846 across days. **D**, Cumulative distributions of RSU firing rates averaged over the 10  
847 minutes of light (solid line) or dark (dashed line) around the transitions, for L-D (left) and  
848 D-L (right) transitions (L-D,  $p = 0.875$ ; D-L,  $p = 0.99$ , two-sample Kolmogorov-Smirnov  
849 test). **E**, As in D, but for FS units (L-D,  $p = 0.99$ ; D-L  $p = 1.0$ , two-sample Kolmogorov-  
850 Smirnov test). **F**, Mean firing rate for each RSU, averaged across all transitions  
851 experienced by that neuron, in L-D (left) and D-L (right) transitions. Paired data indicates  
852 the average FR is for the same neuron. Distributions were not significantly different (L-  
853 D,  $p = 0.677$ ; D-L,  $p = 0.655$ ; Wilcoxon rank-sum test), but individual neurons across the  
854 whole distribution showed consistent changes at the transitions (L-D, \*\*\*  $p = 0.0002$ ; D-  
855 L, \*\*\*\*  $p < 0.0001$ ; Wilcoxon signed-rank test). **G**, as in F, but for FS units. Distributions

856 were not different (L-D,  $p = 0.905$ ; D-L,  $p = 0.827$ ; Wilcoxon rank-sum test), but  
857 individual FS units changed their firing consistently at D-L, but not L-D transitions (L-D,  
858  $p = 0.318$ ; D-L, \*  $p = 0.026$ ; Wilcoxon signed-rank test). **H**, Percent change in firing rate  
859 across transition for RSUs (L-D,  $-7.09\% \pm 1.99\%$ , \*\*\*  $p = 0.0006$ ; D-L,  $15.60\% \pm$   
860  $4.00\%$ ,  $p = **** 0.0002$ ; one-sample t-test). **I**, as H, for FS units. Percentage change in  
861 FR was not different from 0 in either condition (L-D,  $-2.75\% \pm 3.80\%$ ,  $p = 0.475$ ; D-L:  
862  $9.73\% \pm 5.12\%$ ,  $p = 0.067$ , one-sample t-test).

863

864 **Figure 2.** Changes in natural visual input modestly modulate the firing of V1 neurons  
865 during wake but not sleep.

866 *A*, Comparison of mean firing rates, in 10-minute averages around the transitions, in L-D  
867 and D-L transitions when the animal was awake for the whole 20 minutes. Activity in  
868 light and dark was strongly correlated for both transition types. *B*, as in *A*, but for  
869 transitions during which animals were asleep for the 20 minute period around the  
870 transition. Firing rates in light and dark during sleep were also strongly correlated. *C*,  
871 Mean firing rate of individual RSUs, calculated in 10-minute averages around luminance  
872 transitions and averaged across all transitions during which animals were awake.  
873 Neuronal activity changed consistently at the transitions (L-D,  $p = 0.0001$ ; D-L,  $p =$   
874  $0.0457$ ; Wilcoxon signed-rank test). *D*, as in *C*, but for transitions during which animals  
875 were asleep. No significant change was observed (L-D,  $p = 0.656$ ; D-L,  $p = 0.925$ ;  
876 Wilcoxon signed-rank test). *E*, As in *C*, for FS units. Cells' activity only changed  
877 significantly at D-L transitions (L-D,  $p = 0.689$ ; D-L,  $p = 0.039$ ; Wilcoxon signed-rank  
878 test). *F*, As in *D*, for FS cells. No significant change was observed (L-D,  $p = 0.557$ ; D-L,  
879  $p = 0.638$ ; Wilcoxon signed-rank test).

880

881 **Figure 3.** A subset of RSUs consistently increase their firing rate in response to expected  
882 dark-light transitions.

883 *A*, example of a RSU unresponsive to light transitions (left, L-D; right, D-L). Top, binned  
884 firing rate for each transition; bottom, average across transitions. *B*, example RSU that  
885 responds consistently to luminance transitions. *C*, Percentage of RSUs found to be  
886 responsive to L-D (left) and D-L (right) transitions and bootstrap control. Black lines  
887 show experimental value (actual % of responsive neurons); red line shows bootstrap  
888 mean; light red bar shows extent of the bootstrap 95% confidence interval (L-D, actual  
889 value: 6.25%, bootstrap mean: 3.55%; 95% CI: 0% - 12.62%; D-L, actual value: 14.06%;  
890 bootstrap mean: 3.09%; 95% CI: 0% - 9.91%; n = 64). *D*, Mean firing rate averaged  
891 across transitions for all D-L-responsive RSUs, calculated for two hour around each  
892 transition for L-D (top) and D-L (bottom) transitions. The transient nature of the firing  
893 rate response is visible in the bottom panel.

894

895 **Figure 4.** L-D and D-L transitions have no effect on V1 firing rates over short timescales.  
896 **A**, Raster plot showing activity of one example RSU in a 10-second interval around L-D  
897 and D-L transitions. Vertical ticks represent spikes, rows represent transitions happening  
898 on different recording days. **B**, A second example RSU, showing a 30-second interval  
899 around transitions. **C**, Mean ISI for all recorded cells, obtained by averaging ISIs in 10-  
900 second bins around L-D and D-L transitions for different days. Each dot represents the  
901 mean for one cell, obtained by averaging across days. No significant change was  
902 observed (L-D,  $p = 0.97$ ; D-L,  $p = 0.31$ ; Wilcoxon sign-rank test). **D**, As in C, but for 1-  
903 second averages. No significant change was observed (L-D,  $p = 0.27$ ; D-L,  $p = 0.36$ ;  
904 Wilcoxon sign-rank test).  
905

906 **Figure 5.** Randomly timed L-D and D-L transitions induce consistent firing rate changes

907 in RSUs.

908 *A*, Experimental design. Animals were exposed to 10-minute periods of darkness during

909 the light phase, and 10-minute periods of light during the dark phase, at random points

910 throughout the light/dark cycle. Mean firing rates were calculated in 10-minute intervals

911 around the transition. *B*, Percentage of RSUs that were responsive to luminance

912 transitions, when transitions happened in epochs of sleep. Black line shows actual

913 experimental value; red line shows bootstrap mean; light red bar covers the bootstrap

914 95% confidence interval (sleep, L-D: 21.9%, bootstrap mean and 95% CI: 4.42% [0% -

915 8.95%], n=64; D-L: 13.4%, bootstrap mean and 95% CI: 4.31% [0% - 9.38%], n=67). *C*,

916 as in B, but for transitions happening while animals were awake (wake, L-D: 17.6%,

917 bootstrap mean and 95% CI: 4.22% [0% - 8.79%], n=91; D-L: 12.7%, bootstrap mean

918 and 95% CI: 4.33% [0% - 9.09%], n=55).

919

920

921 **Figure 6.** Pairwise correlations in V1 are higher during light than during dark.

922 **A**, Example pairwise correlation structure of 30 neurons from a single animal during light

923 (left; calculated over the 12-hour period at P27) and during dark (right; calculated over

924 the 12-hour period at P27.5). **B**, The average correlation of 922 pairs from five animals

925 over 4 days, normalized to the average correlation of each animal relative to P26 in light.

926 The gap in the data at P26 corresponds to the time animals were anesthetized for

927 monocular deprivation, which was excluded from analysis. **C**, Comparison of the average

928 correlation of 922 pairs during light and during dark with bin size 5ms (left) and bin size

929 100ms (right). (left:  $p < 10^{-70}$ ; right:  $p < 10^{-125}$ , Wilcoxon signed-rank test). **D**,

930 Comparison of average correlation of 922 pairs in wake during light and during dark with

931 bin size 5ms (left) and bin size 100ms (right). (left:  $p < 10^{-55}$ ; right:  $p < 10^{-110}$ ,

932 Wilcoxon signed-rank test).

933

934

935



936 **Figure 7.** Prolonged darkness results in increased *c-fos* expression upon light re-  
937 exposure.

938 **A**, Experimental protocol. Animals were exposed to either a regular 12h/12h light/dark  
939 cycle, and sacrificed 1 hour after lights on at P29 (regular control, RC, n = 22 slices, 4  
940 animals); exposed to darkness for 60 hours starting at P26 and sacrificed before lights on  
941 (dark control, DC, n = 23 slices, 4 animals); exposed to 60 hours of darkness starting at  
942 P26 and sacrificed 1 hour after light re-exposure (light exposed, LE, n = 28 slices, 5  
943 animals). **B**, representative images showing DAPI (top row) and *c-fos* (bottom row)  
944 immunostaining for regular control (left), dark control (middle), and light exposed (right)  
945 animals. **C**, Percentage of *c-fos*-positive cells in all three groups (RC: 11.4% ± 1.6%; DC:  
946 6.1% ± 0.8%; LE: 16.8% ± 1.7%. \* p=0.032; \*\*\* p=0.001, one-way ANOVA with Tukey  
947 post-hoc test). **D**, Total co-localized DAPI and *c-fos* staining intensity, normalized to  
948 average of RC group (RC: 1.00 ± 0.06; DC: 0.79 ± 0.05; LE: 1.31 ± 0.09; \* p=0.011; \*\*\*  
949 p=0.001, one-way ANOVA with Tukey post-hoc test).

950

951

952 **Figure 8.** Light re-exposure after prolonged darkness causes a robust and widespread  
953 increase in V1 firing, following a slight reduction in firing rates over the dark period.  
954 *A*, Time course of RSU and FS spiking in a 2-hour period around the time of light re-  
955 exposure. Individual unit traces (top) and average across cells (bottom) shows marked  
956 increase in firing at the time of lights on. *B*, Percentage change in firing rate between the  
957 10 minutes prior to and the 10 minutes immediately following light re-exposure (all cells,  
958  $87.1\% \pm 13.5\%$ ,  $n=44$ , \*\*\*\*  $p < 10^{-7}$ ; RSU,  $80.7\% \pm 14.9\%$ ,  $n=32$ , \*\*\*  $p < 10^{-5}$ ; FS,  
959  $104.3\% \pm 29.8\%$ ,  $n=12$ , \*\*  $p = 0.005$ ; one-sample t-test). *C*, Mean firing rate in the 10  
960 minutes before and after the transition, for each recorded RSU (\*\*\*\*  $p < 10^{-5}$ , Wilcoxon  
961 signed-rank test). *D*, As in C, for recorded FS cells (\*  $p = 0.034$ , Wilcoxon signed-rank  
962 test). *E*, Mean firing rate for all recorded RSUs, averaged across the first 12-hour period  
963 within the 60 hours of darkness (First 12h, mean  $\pm$  s.e.m:  $4.00 \pm 0.97$  Hz, median: 1.18  
964 Hz,  $n = 47$ ) and the last 12-hour period of darkness before light re-exposure (Last 12h,  
965 mean  $\pm$  s.e.m:  $2.27 \pm 0.57$  Hz, median: 0.85 Hz,  $n = 55$ ; \*  $p = 0.044$ , Wilcoxon rank-sum  
966 test).  
967

Figure 1

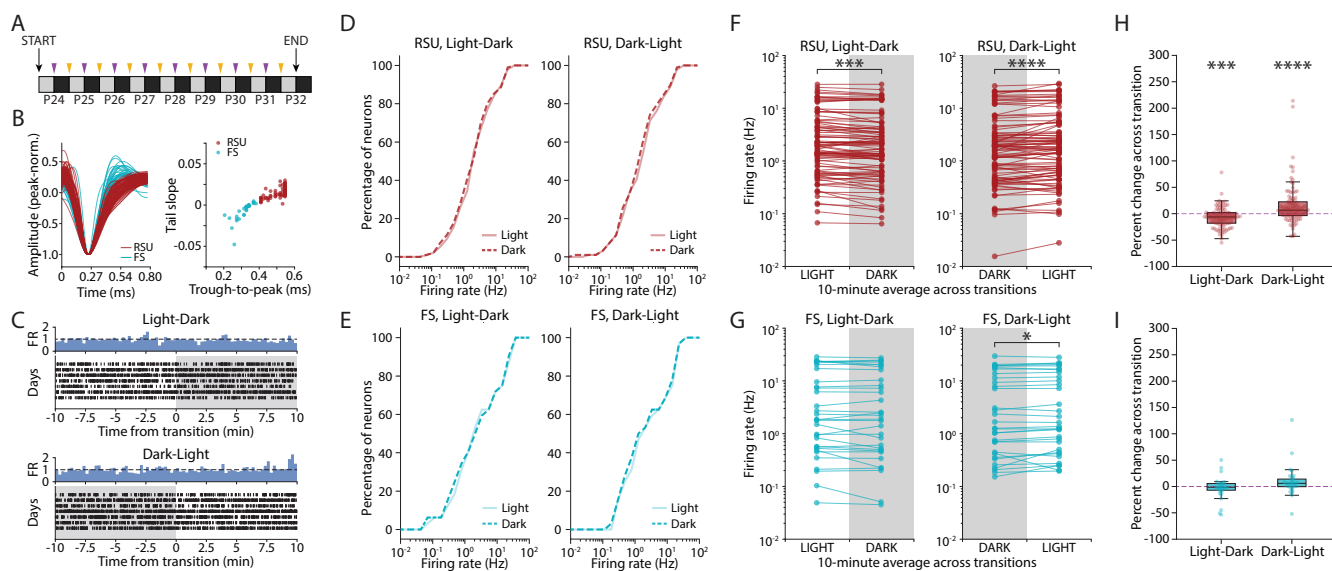

Figure 2

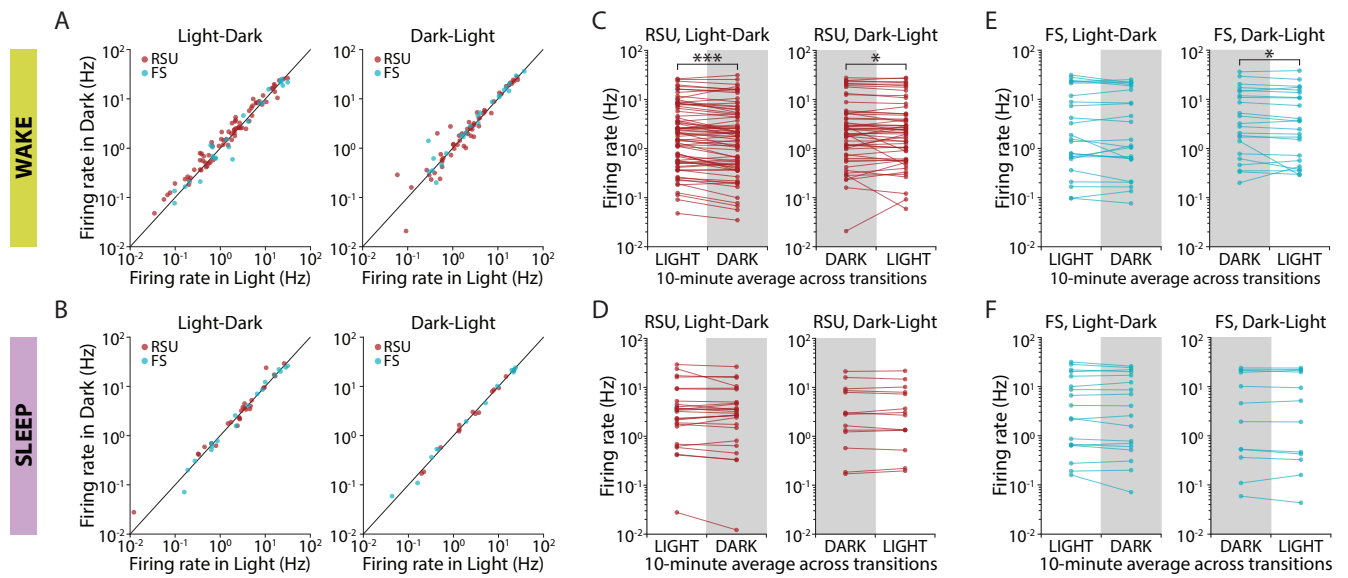

Figure 3

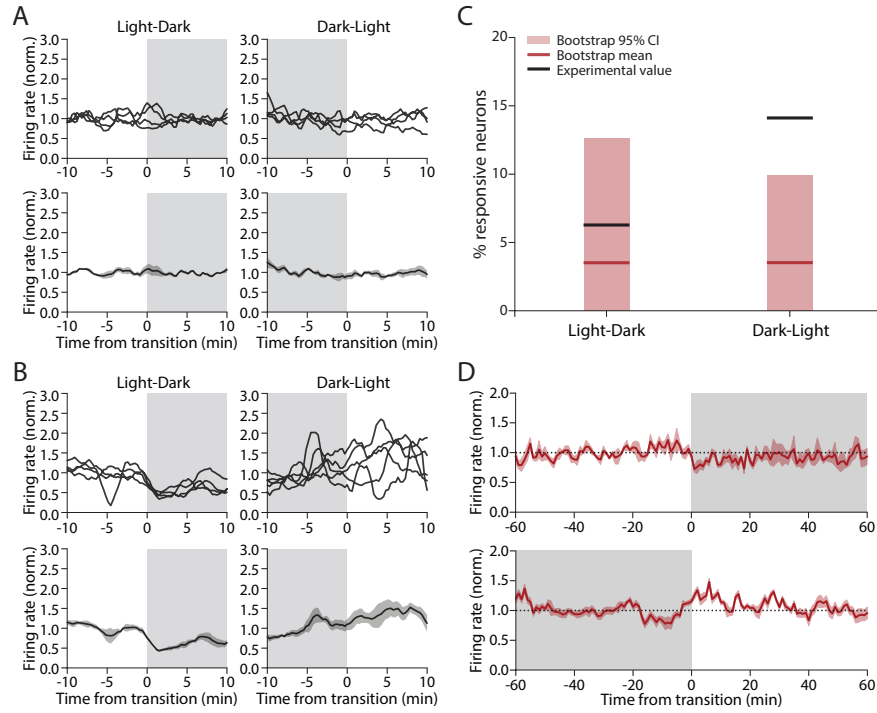

Figure 4

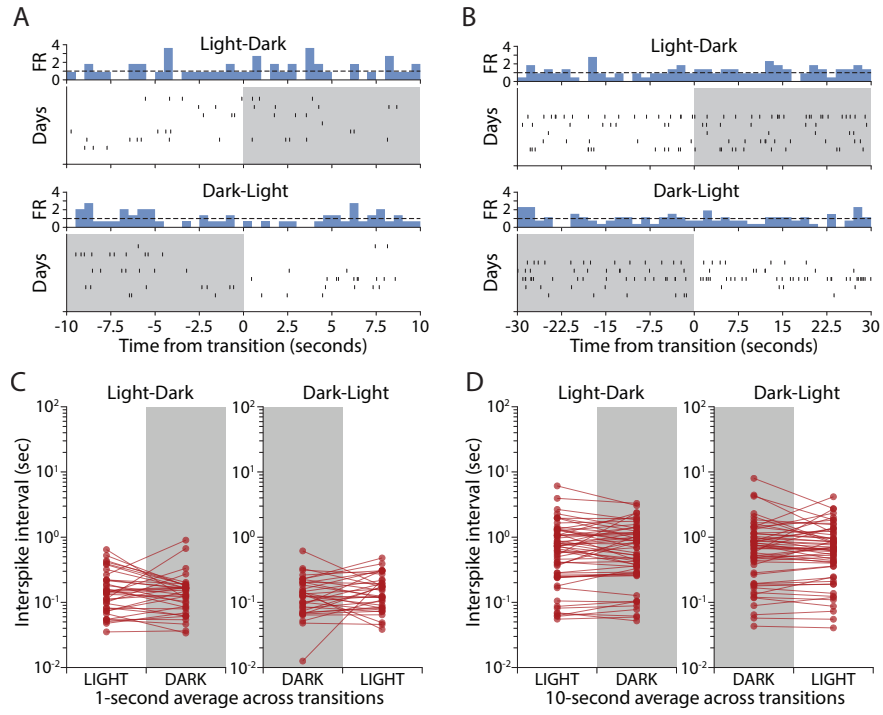

Figure 5

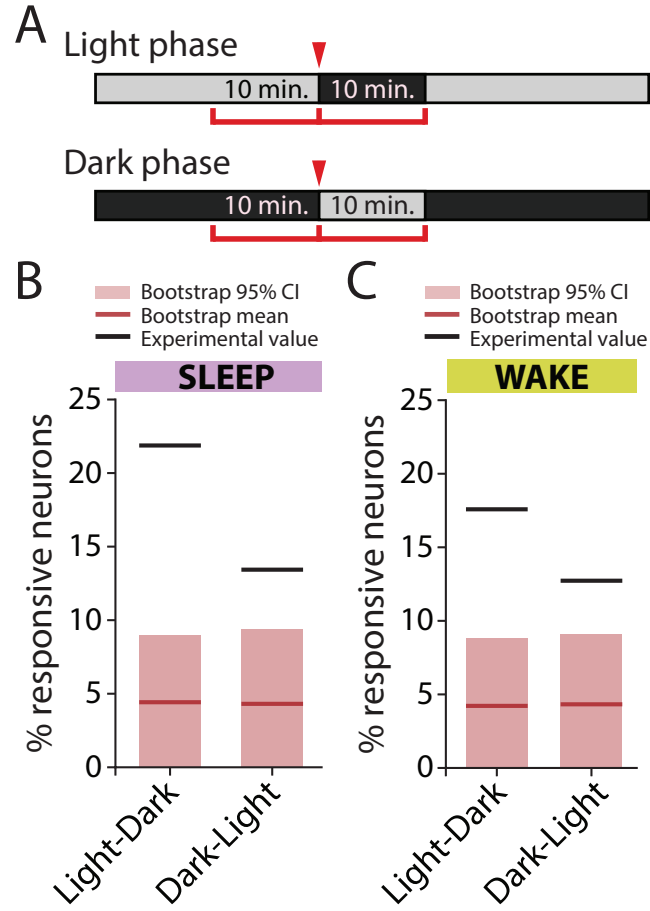





Figure 7

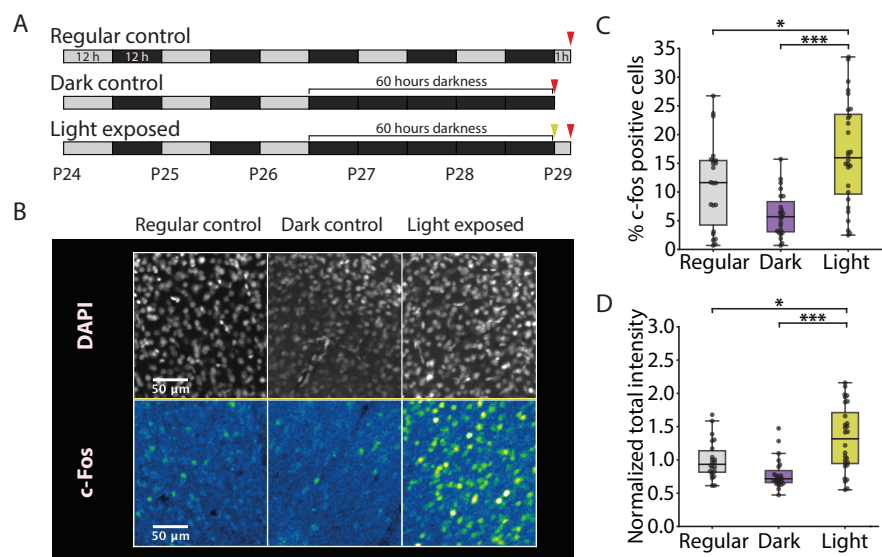

Figure 8

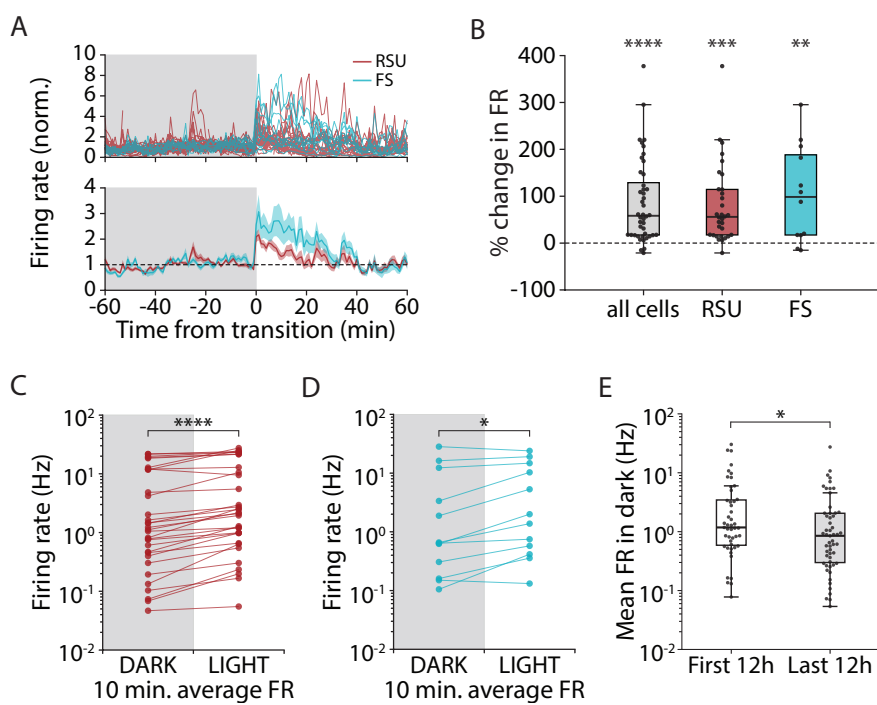

Source: https://www.biorxiv.org/content/10.1101/542670v1.full.pdf
